# Supplementary material
Source: PubMed Central journal article supplement (PMC9086077)

**eFigure1. Factors Associated with Cancelled and Postponed Physical and Mental Health Care and Cancer Screening, All Survey Waves**

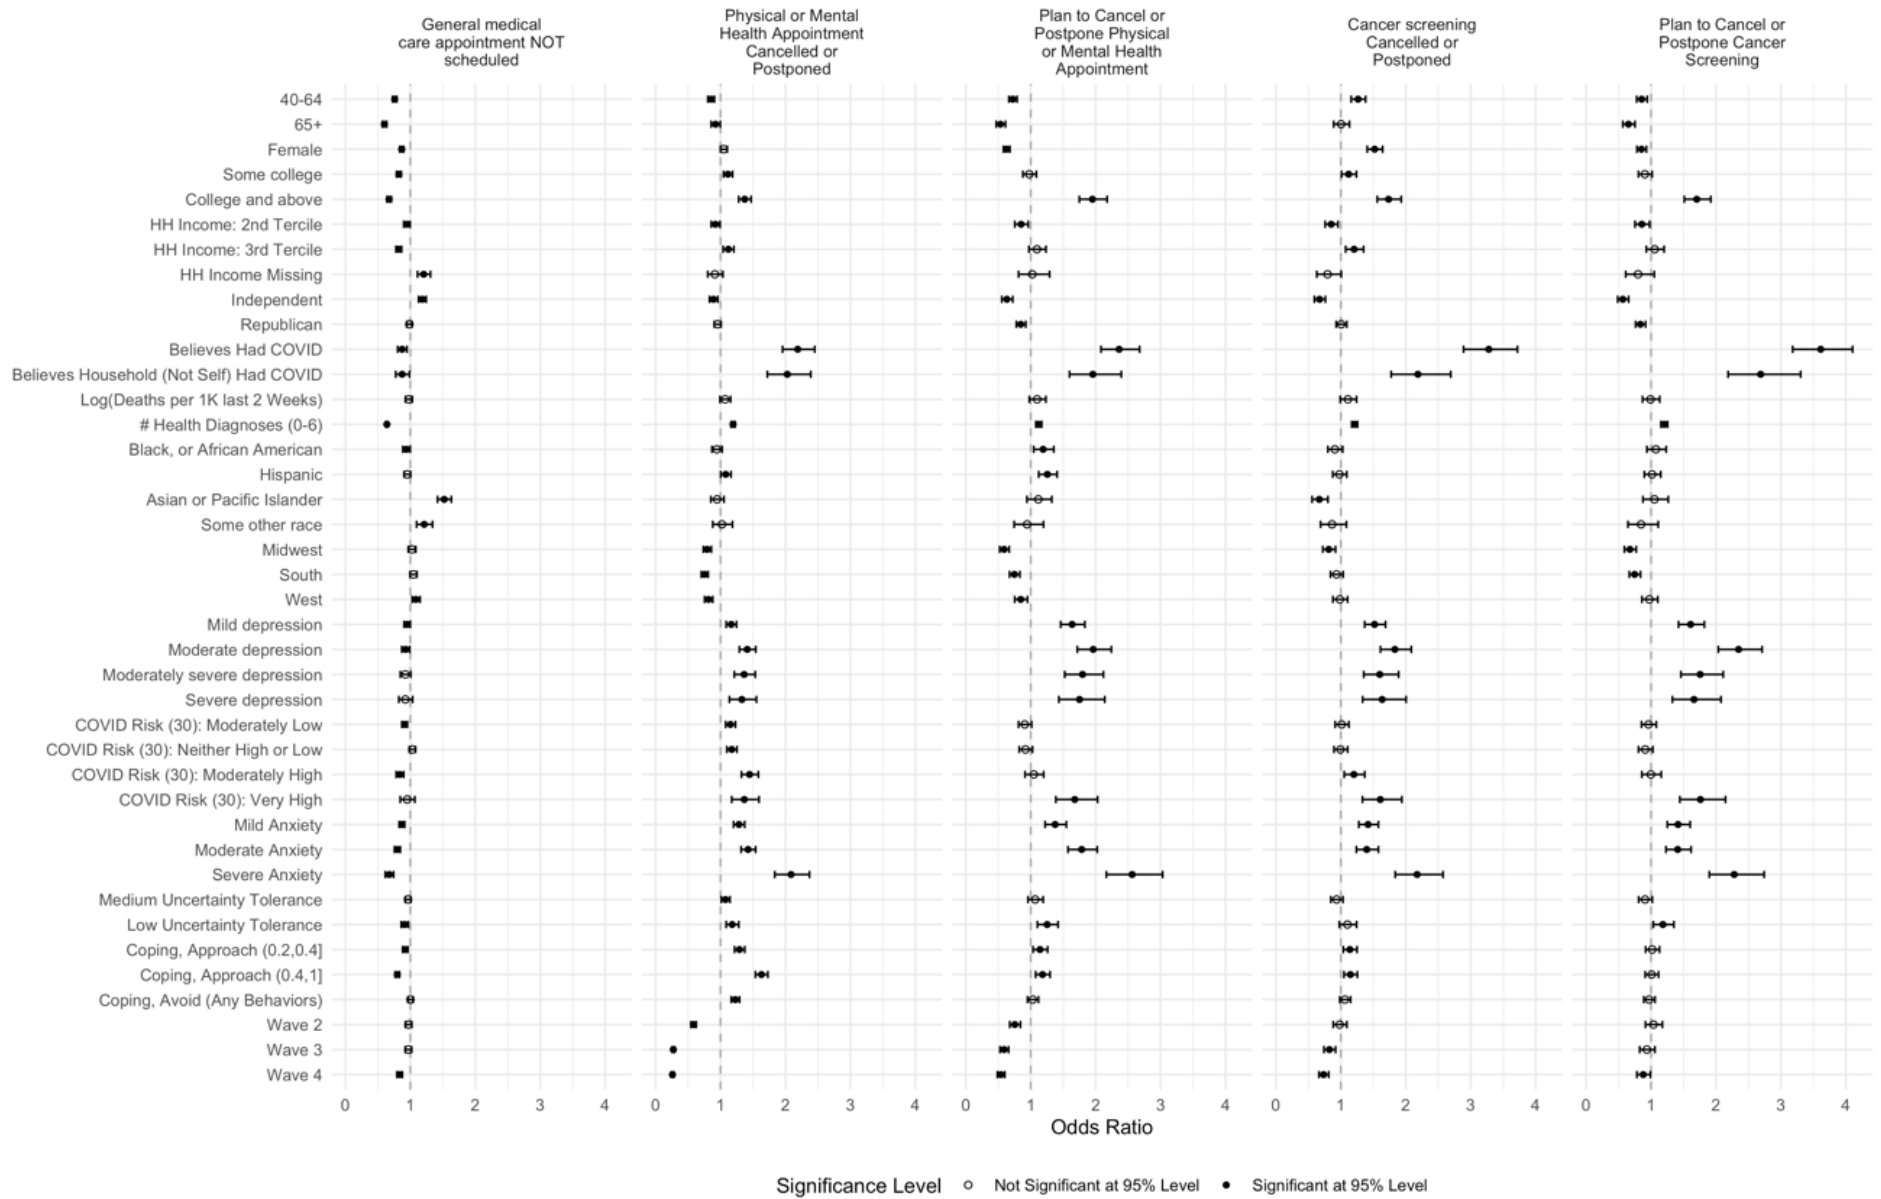

Supplement: 11606_2021_7254_MOESM1_ESM.pdf [file 11606_2021_7254_MOESM1_ESM.pdf]
